# Supplementary material
Source: PubMed Central journal article supplement (PMC6105510)
Supplement: NIHMS976531-supplement-Supplemental_Digital_Content.pdf [file NIHMS976531-supplement-Supplemental_Digital_Content.pdf]

## Appendix 1. Fagotti Scoring Algorithm

| Tumor Characteristic                                                                                                                                   | Score                          |
|--------------------------------------------------------------------------------------------------------------------------------------------------------|--------------------------------|
| Peritoneal carcinomatosis:<br>Massive peritoneal involvement and/or miliary pattern of distribution                                                    | 0 (not present) or 2 (present) |
| Diaphragmatic surface involvement:<br>Widespread infiltrating carcinomatosis and/or confluent nodules to most of diaphragm surface                     | 0 (not present) or 2 (present) |
| Mesenteric involvement:<br>Large infiltrating nodules and/or involvement of the root of the mesentery based on limited movement of intestinal segments | 0 (not present) or 2 (present) |
| Omental involvement:<br>Tumor diffusion of the omentum up to the greater curvature of the stomach                                                      | 0 (not present) or 2 (present) |
| Bowel involvement:<br>Tumor infiltration of large or small bowel requiring intestinal resection (excludes rectosigmoid colon) and/or                   | 0 (not present) or 2 (present) |
| Stomach involvement:<br>Obvious tumor infiltration into gastric wall                                                                                   | 0 (not present) or 2 (present) |
| Liver involvement:<br>Liver surface lesions >2 cm in size                                                                                              | 0 (not present) or 2 (present) |

Fleming ND, Nick AM, Coleman RL, Westin SN, Ramirez PT, Soliman PT, et al. Laparoscopic surgical algorithm to triage the timing of tumor reductive surgery in advanced ovarian cancer. *Obstet Gynecol* 2018; 132.

The authors provided this information as a supplement to their article.

©2018 American College of Obstetricians and Gynecologists.

## Appendix 2. Laparoscopy Surgical Data

|                                              | All laparoscopy patients<br>(n=215) |
|----------------------------------------------|-------------------------------------|
| Laparoscopy time, median<br>(minutes, range) | 37 (6-179)                          |
| EBL, median (mL, range)                      | 5 (0-150)                           |
| Entry method                                 |                                     |
| Direct optical entry                         | 191 (89%)                           |
| Open trocar entry                            | 11 (5%)                             |
| Unknown                                      | 13 (6%)                             |
| Abdominal access point                       |                                     |
| LUQ                                          | 184 (86%)                           |
| Umbilical                                    | 14 (6%)                             |
| RUQ                                          | 1 (0.5%)                            |
| RLQ                                          | 1 (0.5%)                            |
| Suprapubic                                   | 2 (1%)                              |
| Unknown                                      | 13 (6%)                             |
| Complications                                |                                     |
| GI trocar injury                             | 5 (2%)                              |
| Port site metastases                         | 10 (5%)                             |
| Wound                                        | 10 (5%)                             |

EBL=Estimated blood loss, LUQ=left upper quadrant, RUQ=right upper quadrant, RLQ=right lower quadrant

Fleming ND, Nick AM, Coleman RL, Westin SN, Ramirez PT, Soliman PT, et al. Laparoscopic surgical algorithm to triage the timing of tumor reductive surgery in advanced ovarian cancer. *Obstet Gynecol* 2018; 132.

The authors provided this information as a supplement to their article.

©2018 American College of Obstetricians and Gynecologists.

### Appendix 3. Clinical and Demographic Data on Entire Cohort by Subgroup Analysis

|                                            | No Scope/NACT<br>(n=245) | Scope/NACT<br>(n=102) | Primary Surgery<br>(n=138) | p-value |
|--------------------------------------------|--------------------------|-----------------------|----------------------------|---------|
| Age in years, median<br>(range)            | 67 (22-89)               | 62 (36-85)            | 62 (37-88)                 | <0.001  |
| BMI, median<br>(kg/m <sup>2</sup> , range) | 27.2 (13.1-59.3)         | 28.4 (17.1-49.4)      | 26.1 (17.9-47.2)           | 0.42    |
| Race                                       |                          |                       |                            | 0.71    |
| White                                      | 200 (85%)                | 89 (90%)              | 120 (87%)                  |         |
| Black                                      | 22 (9%)                  | 5 (5%)                | 10 (7%)                    |         |
| Other                                      | 13 (6%)                  | 5 (5%)                | 6 (4%)                     |         |
| Missing                                    | 10                       | 3                     | 2                          |         |
| ECOG                                       |                          |                       |                            | <0.001  |
| 0-1                                        | 154 (71%)                | 84 (88%)              | 120 (94%)                  |         |
| 2                                          | 40 (18%)                 | 10 (10%)              | 7 (5%)                     |         |
| 3-4                                        | 23 (11%)                 | 2 (2%)                | 1 (1%)                     |         |
| Missing                                    | 28                       | 6                     | 10                         |         |
| Charlson<br>Comorbidity Index,<br>median   | 3 (0-10)                 | 3 (1-14)              | 3 (0-10)                   | <0.001  |
| CA-125 at Dx,<br>median (U/mL,<br>range)   | 774 (9.7-45600)          | 749 (41.5-12472)      | 343 (10.9-11837)           | <0.001  |
| BRCA status                                |                          |                       |                            | 0.05    |
| No mutation                                | 124 (81%)                | 58 (84%)              | 66 (69%)                   |         |
| BRCA 1                                     | 11 (7%)                  | 8 (12%)               | 18 (19%)                   |         |
| BRCA 2                                     | 14 (8%)                  | 2 (3%)                | 6 (6%)                     |         |
| VUS                                        | 6 (4%)                   | 1 (1%)                | 5 (5%)                     |         |
| Unknown                                    | 90                       | 33                    | 43                         |         |
| Disease site                               |                          |                       |                            | <0.001  |
| Fallopian tube                             | 6 (2%)                   | 4 (4%)                | 8 (6%)                     |         |
| Ovarian                                    | 181 (74%)                | 88 (86%)              | 116 (84%)                  |         |
| Primary peritoneal                         | 43 (18%)                 | 10 (10%)              | 14 (10%)                   |         |
| Mullerian NOS                              | 15 (6%)                  | 0 (0%)                | 0 (0%)                     |         |
| Stage                                      |                          |                       |                            | <0.001  |
| II                                         | 0 (0%)                   | 0 (0%)                | 18 (13%)                   |         |
| III                                        | 67 (27%)                 | 80 (78%)              | 108 (78%)                  |         |
| IVA                                        | 22 (9%)                  | 9 (9%)                | 2 (1%)                     |         |
| IVB                                        | 153 (64%)                | 13 (13%)              | 10 (7%)                    |         |
| Histology                                  |                          |                       |                            | <0.001  |
| Serous                                     | 200 (82%)                | 93 (91%)              | 108 (78%)                  |         |
| Endometrioid                               | 3 (1%)                   | 0 (0%)                | 5 (4%)                     |         |
| Mucinous                                   | 1 (0%)                   | 0 (0%)                | 1 (1%)                     |         |
| Clear cell                                 | 6 (2%)                   | 5 (5%)                | 3 (2%)                     |         |
| Adenoca NOS                                | 23 (9%)                  | 0 (0%)                | 2 (2%)                     |         |
| Mixed                                      | 6 (2%)                   | 2 (2%)                | 11 (8%)                    |         |

Fleming ND, Nick AM, Coleman RL, Westin SN, Ramirez PT, Soliman PT, et al. Laparoscopic surgical algorithm to triage the timing of tumor reductive surgery in advanced ovarian cancer. *Obstet Gynecol* 2018; 132.

The authors provided this information as a supplement to their article.

©2018 American College of Obstetricians and Gynecologists.

|                |        |        |        |  |
|----------------|--------|--------|--------|--|
| Carcinosarcoma | 6 (2%) | 2 (2%) | 8 (6%) |  |
|----------------|--------|--------|--------|--|

Scope=Laparoscopy, NACT=Neoadjuvant chemotherapy, BMI=Body mass index, ECOG=Eastern Cooperative Oncology Group, Dx=diagnosis, VUS=Variant of uncertain significance, NOS=not otherwise specified, Adenoca=adenocarcinoma

\*Percentages may not equal 100% due to rounding

Fleming ND, Nick AM, Coleman RL, Westin SN, Ramirez PT, Soliman PT, et al. Laparoscopic surgical algorithm to triage the timing of tumor reductive surgery in advanced ovarian cancer. *Obstet Gynecol* 2018; 132.

The authors provided this information as a supplement to their article.

©2018 American College of Obstetricians and Gynecologists.

#### Appendix 4. Surgical and Chemotherapy Data on Entire Cohort by Subgroup Analysis

|                                               | No Scope/NACT<br>(n=245) | Scope/NACT<br>(n=102) | Primary Surgery<br>(n=138) | p-value |
|-----------------------------------------------|--------------------------|-----------------------|----------------------------|---------|
| TRS                                           |                          |                       |                            | <0.001  |
| Primary                                       | 0 (0%)                   | 0 (0%)                | 138 (100%)                 |         |
| Interval                                      | 155 (65%)                | 84 (82%)              | 0 (0%)                     |         |
| No surgery                                    | 82 (35%)                 | 18 (18%)              | 0 (0%)                     |         |
| Missing                                       | 8                        | 0                     | 0                          |         |
| Surgical approach                             |                          |                       |                            | 0.04    |
| Open                                          | 139 (90%)                | 68 (83%)              | 129 (94%)                  |         |
| Laparoscopy                                   | 14 (9%)                  | 14 (17%)              | 8 (6%)                     |         |
| Robotic                                       | 1 (1%)                   | 0 (0%)                | 0 (0%)                     |         |
| Missing                                       | 1                        | 2                     | 1                          |         |
| OR time, median (minutes, range)              | 277 (147-937)            | 305 (180-688)         | 370 (160-798)              | <0.001  |
| LOS, median (days, range)                     | 3 (0-25)                 | 4 (0-43)              | 5 (0-30)                   | <0.001  |
| EBL, median (mL, range)                       | 200 (20-1750)            | 300 (25-6000)         | 500 (50-2600)              | <0.001  |
| Residual disease at TRS                       |                          |                       |                            | 0.25    |
| R0                                            | 124 (81%)                | 62 (76%)              | 120 (88%)                  |         |
| ≤1 cm                                         | 14 (9%)                  | 10 (12%)              | 9 (7%)                     |         |
| >1 cm                                         | 15 (10%)                 | 10 (12%)              | 8 (6%)                     |         |
| Missing                                       | 2                        | 2                     | 1                          |         |
| Number of chemotherapy cycles, median (range) |                          |                       |                            |         |
| NACT                                          | 3 (1-14)                 | 3 (1-12)              |                            | 0.20    |
| Total cycles                                  | 6 (0-14)                 | 6 (0-12)              | 6 (0-9)                    | 0.009   |

Scope=Laparoscopy, NACT=Neoadjuvant chemotherapy, TRS=Tumor reductive surgery, LOS=Length of stay, EBL=Estimated blood loss, R0=no gross residual disease

Fleming ND, Nick AM, Coleman RL, Westin SN, Ramirez PT, Soliman PT, et al. Laparoscopic surgical algorithm to triage the timing of tumor reductive surgery in advanced ovarian cancer. *Obstet Gynecol* 2018; 132.

The authors provided this information as a supplement to their article.

©2018 American College of Obstetricians and Gynecologists.

### Appendix 5. Tumor Reductive Surgical Procedures in Entire Cohort by Subgroup Analysis

|                            | No Scope/NACT<br>(n=155) | Scope/NACT<br>(n=84) | Primary Surgery<br>(n=138) | p-value |
|----------------------------|--------------------------|----------------------|----------------------------|---------|
| <b>Surgical Procedures</b> |                          |                      |                            |         |
| Hysterectomy               | 109 (47%)                | 61 (60%)             | 98 (71%)                   | <0.001  |
| USO or BSO                 | 140 (61%)                | 83 (80%)             | 130 (94%)                  | <0.001  |
| Omentectomy                | 148 (64%)                | 79 (78%)             | 130 (94%)                  | <0.001  |
| Diaphragm stripping        | 15 (7%)                  | 8 (8%)               | 22 (16%)                   | 0.008   |
| Diaphragm resection        | 15 (7%)                  | 8 (8%)               | 11 (8%)                    | 0.71    |
| Liver resection            | 17 (8%)                  | 6 (6%)               | 13 (9%)                    | 0.58    |
| Peritoneal stripping       | 22 (10%)                 | 16 (16%)             | 40 (29%)                   | <0.001  |
| Splenectomy                | 11 (5%)                  | 6 (6%)               | 11 (8%)                    | 0.46    |
| Partial pancreatectomy     | 4 (2%)                   | 1 (1%)               | 0 (0%)                     | 0.30    |
| Pelvic lymphadenectomy     | 15 (6%)                  | 2 (2%)               | 32 (23%)                   | <0.001  |
| PA lymphadenectomy         | 21 (9%)                  | 2 (2%)               | 41 (30%)                   | <0.001  |
| <b>Bowel procedures</b>    |                          |                      |                            |         |
| Appendectomy               | 22 (9%)                  | 20 (19%)             | 37 (27%)                   | <0.001  |
| End colostomy              | 3 (1%)                   | 4 (4%)               | 7 (5%)                     | 0.06    |
| Right colon resection      | 6 (3%)                   | 1 (1%)               | 7 (5%)                     | 0.19    |
| Ileostomy                  | 2 (1%)                   | 1 (1%)               | 10 (7%)                    | 0.001   |
| Partial gastric resection  | 2 (1%)                   | 0 (0%)               | 2 (1%)                     | 0.67    |
| Posterior exenteration     | 2 (1%)                   | 3 (3%)               | 12 (9%)                    | <0.001  |
| Rectosigmoid resection     | 11 (5%)                  | 11 (11%)             | 44 (32%)                   | <0.001  |
| Small bowel resection      | 7 (3%)                   | 3 (3%)               | 12 (9%)                    | 0.04    |
| Transverse colon resection | 7 (3%)                   | 5 (5%)               | 4 (3%)                     | 0.57    |

USO=unilateral salpingoophorectomy, BSO=bilateral salpingoophorectomy, PA=para-aortic

\*Percentages are based off of the number of patients undergoing tumor reductive surgery in each group

Fleming ND, Nick AM, Coleman RL, Westin SN, Ramirez PT, Soliman PT, et al. Laparoscopic surgical algorithm to triage the timing of tumor reductive surgery in advanced ovarian cancer. *Obstet Gynecol* 2018; 132.

The authors provided this information as a supplement to their article.

©2018 American College of Obstetricians and Gynecologists.

Page 6 of 9

**Appendix 6. Progression-free survival (PFS) in entire cohort by subgroup. Median PFS was 21.4 months for primary surgery compared to 14.1 months no laparoscopy-NACT and 13.1 months laparoscopy-NACT ( $P < .001$ ). NACT, neoadjuvant chemotherapy.**

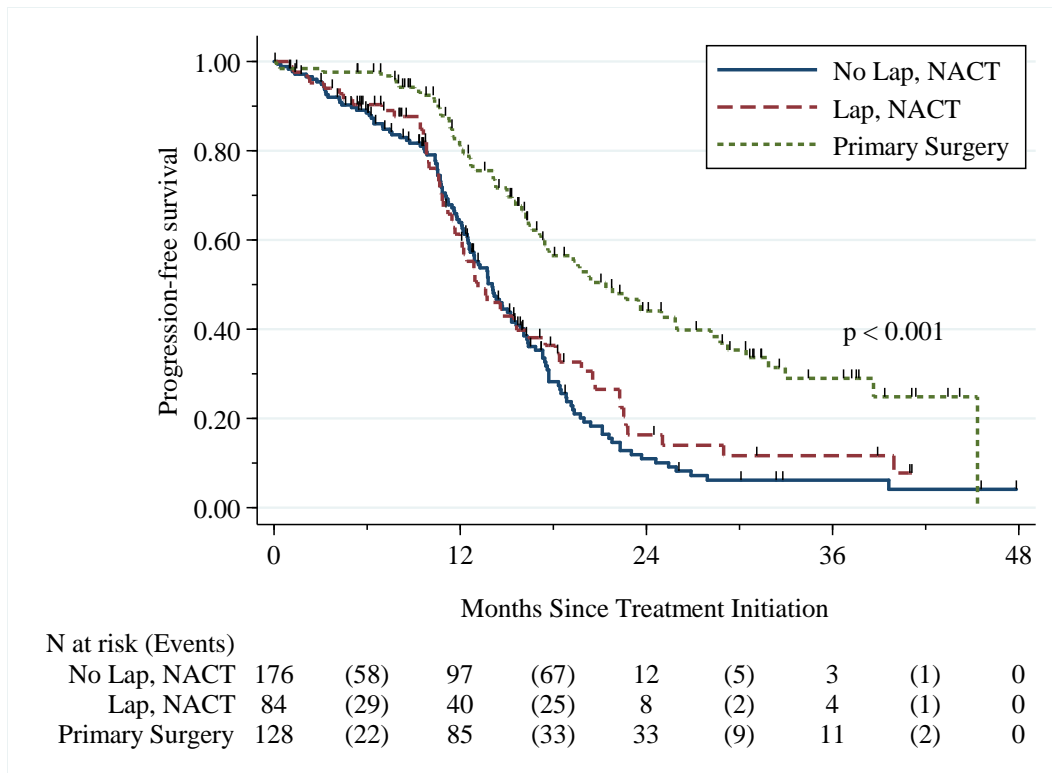

Fleming ND, Nick AM, Coleman RL, Westin SN, Ramirez PT, Soliman PT, et al. Laparoscopic surgical algorithm to triage the timing of tumor reductive surgery in advanced ovarian cancer. *Obstet Gynecol* 2018; 132.

The authors provided this information as a supplement to their article.

©2018 American College of Obstetricians and Gynecologists.

**Appendix 7. Progression-free survival (PFS) in entire cohort by residual disease and subgroup. Median PFS was as follows: primary surgery-R0 23.5 months; primary surgery-R1 16.4 months; NACT-R0 15.6 months; NACT-R1 13.1 months ( $P < .001$ ). NACT, neoadjuvant chemotherapy.**

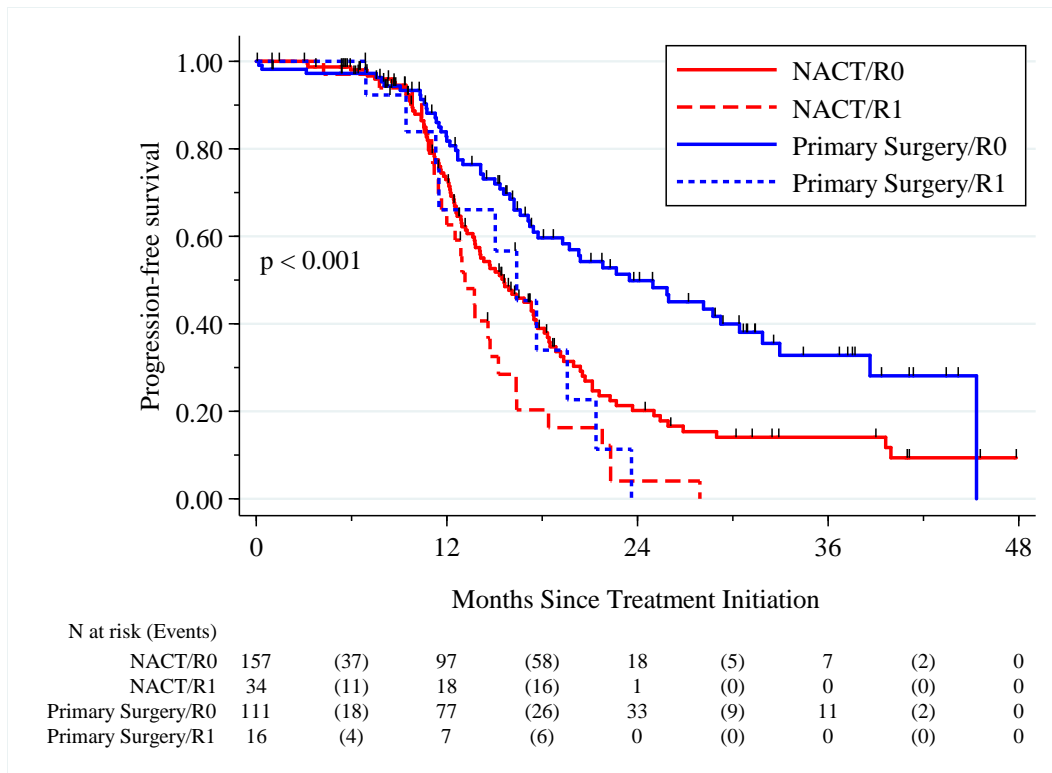

Fleming ND, Nick AM, Coleman RL, Westin SN, Ramirez PT, Soliman PT, et al. Laparoscopic surgical algorithm to triage the timing of tumor reductive surgery in advanced ovarian cancer. *Obstet Gynecol* 2018; 132.

The authors provided this information as a supplement to their article.

©2018 American College of Obstetricians and Gynecologists.



### Appendix 8. Multivariate Analysis for PFS for Entire Cohort Based on Subgroup Analysis

|                            | HR (95% CI)      | p-value |
|----------------------------|------------------|---------|
| Age at diagnosis           | 1.00 (0.98-1.03) | 0.82    |
| ECOG status                | 1.28 (1.02-1.61) | 0.03    |
| Charlson comorbidity index | 1.06 (0.93-1.20) | 0.37    |
| Baseline CA-125            | 1.00 (1.00-1.00) | 0.43    |
| Baseline platelet count    | 1.00 (1.00-1.00) | 0.06    |
| Stage                      |                  |         |
| II                         | ---              |         |
| III                        | 2.14 (0.85-5.37) | 0.11    |
| IVA                        | 2.68 (0.89-8.11) | 0.08    |
| IVB                        | 2.15 (0.79-5.84) | 0.14    |
| BRCA status                |                  |         |
| No mutation                | ---              |         |
| BRCA 1/2                   | 0.66 (0.39-1.09) | 0.11    |
| Unknown                    | 1.09 (0.75-1.59) | 0.65    |
| Resection status           |                  |         |
| R0                         | ---              |         |
| ≤1 cm                      | 2.03 (1.30-3.19) | 0.002   |
| >1 cm                      | 1.26 (0.69-2.31) | 0.45    |
| Treatment group            |                  |         |
| No Scope/NACT              | ---              |         |
| Scope/NACT                 | 1.17 (0.73-1.87) | 0.51    |
| Primary surgery            | 0.88 (0.55-0.42) | 0.61    |

ECOG=Eastern Cooperative Oncology Group, Scope=Laparoscopy, NACT=Neoadjuvant chemotherapy

Fleming ND, Nick AM, Coleman RL, Westin SN, Ramirez PT, Soliman PT, et al. Laparoscopic surgical algorithm to triage the timing of tumor reductive surgery in advanced ovarian cancer. *Obstet Gynecol* 2018; 132.

The authors provided this information as a supplement to their article.

©2018 American College of Obstetricians and Gynecologists.
